## **Remote home monitoring (virtual wards) during the COVID-19 pandemic: a systematic review**

Cecilia Vindrola-Padros (0000-0001-7859-1646), Kelly E Singh (0000-0002-4513-1026), Manbinder S Sidhu (0000-0001-5663-107X), Theo Georghiou (0000-0001-9532-876X), Chris Sherlaw-Johnson (0000-0002-4851-6060), Sonila M Tomini (0000-0002-4241-2121), Matthew Inada-Kim (0000-0001-6026-2246), Karen Kirkham, Allison Streetly (0000-0002-7588-9276), Naomi J Fulop (0000-0001-5306-6140)

Cecilia Vindrola-Padros, Senior Research Fellow, Department of Targeted Intervention, University College London (UCL), Charles Bell House, 43-45 Foley Street, London, W1W 7TY, United Kingdom, [c.vindrola@ucl.ac.uk](mailto:c.vindrola@ucl.ac.uk).

Kelly Elizabeth Singh, Evaluation Fellow, Health Services Management Centre, School of Social Policy, University of Birmingham, Park House, University of Birmingham, Edgbaston, Birmingham, B15 2RT, UK, [k.e.singh@bham.ac.uk](mailto:k.e.singh@bham.ac.uk).

Manbinder S Sidhu, Research Fellow, Health Services Management Centre, School of Social Policy, University of Birmingham, Park House, University of Birmingham, Edgbaston, Birmingham, B15 2RT, UK, [m.s.sidhu@bham.ac.uk](mailto:m.s.sidhu@bham.ac.uk).

Theo Georghiou, Senior Fellow, Nuffield Trust, 59 New Cavendish Street, London, W1G 7LP, UK, [theo.georghiou@nuffieldtrust.org.uk](mailto:theo.georghiou@nuffieldtrust.org.uk).

Chris Sherlaw-Johnson, Senior Fellow, Nuffield Trust, 59 New Cavendish Street, London, W1G 7LP, UK, [chris.sherlaw-johnson@nuffieldtrust.org.uk](mailto:chris.sherlaw-johnson@nuffieldtrust.org.uk)

Sonila M Tomini, Research Fellow, UCL Department of Applied Health Research, University College London, Gower Street London, WC1E 6BT, UK, [s.tomini@ucl.ac.uk](mailto:s.tomini@ucl.ac.uk)

Matthew Inada-Kim, Consultant Acute Physician, Hampshire Hospitals NHS Foundation Trust, Clinical Director Patient Safety & Digital, Wessex Academic Health & Science Network, National COVID Clinical Reference groups- Primary care, Secondary care, Care homes, National Clinical Lead Deterioration & National Specialist Advisor Sepsis, NHS England and NHS Improvement, McGill ward, Royal Hampshire County Hospital, Romsey Road, Winchester SO21 1QW, UK, [matthew.inada-kim@nhs.net](mailto:matthew.inada-kim@nhs.net).

Karen Kirkham, General Practitioner NHS Dorset, Integrated Care System Clinical Lead, NHSE/I Senior Medical Advisor Primary Care Transformation, Dorset CCG, Vespasian House, Barrack Rd, Dorchester, Dorset DT1 7TG, UK, [Karen.kirkham@dorsetccg.nhs.uk](mailto:Karen.kirkham@dorsetccg.nhs.uk).

Allison Streetly, Senior Lecturer in Public Health Kings College London, Department of Population Health Sciences Faculty of Life Sciences & Medicine King's College London SE1 1UL, UK and Deputy National Lead Healthcare Public Health, Public Health England 133-155 Waterloo Rd, London SE1 8UG, UK, [allison.streetly@phe.gov.uk](mailto:allison.streetly@phe.gov.uk)

Naomi J Fulop, Professor of Health Care Organisation and Management, UCL Department of Applied Health Research, University College London, Gower Street London WC1E 6BT, UK, [n.fulop@ucl.ac.uk](mailto:n.fulop@ucl.ac.uk)

**NOTE: This preprint reports new research that has not been certified by peer review and should not be used to guide clinical practice.**

**Corresponding author:**

Dr Cecilia Vindrola  
Senior Research Fellow  
Department of Targeted Intervention  
University College London (UCL)  
Charles Bell House  
43-45 Foley Street  
London  
W1W 7TY  
UK  
[c.vindrola@ucl.ac.uk](mailto:c.vindrola@ucl.ac.uk)

## ABSTRACT

**Objectives:** The aim of this review was to analyse the implementation and impact of remote home monitoring models (virtual wards) during COVID-19, identifying their main components, processes of implementation, target patient populations, impact on outcomes, costs and lessons learnt.

**Design:** A rapid systematic review to capture an evolving evidence base. We used the Preferred Reporting Items for Systematic Reviews and Meta-Analysis (PRISMA) statement.

**Setting:** The review included models led by primary and secondary care across seven countries.

**Participants:** 27 articles were included in the review.

**Main outcome measures:** Impact of remote home monitoring on virtual length of stay, escalation, emergency department attendance/reattendance, admission/readmission and mortality.

**Results:** The aim of the models was to maintain patients safe in the right setting. Most models were led by secondary care and confirmation of COVID-19 was not required (in most cases). Monitoring was carried via online platforms, paper-based systems with telephone calls or (less frequently) through wearable sensors. Models based on phone calls were considered more inclusive. Patient/carer training was identified as a determining factor of success. We could not reach substantive conclusions regarding patient safety and the identification of early deterioration due to lack of standardised reporting and missing data. Economic analysis was not reported for most of the models and did not go beyond reporting resources used and the amount spent per patient monitored.

**Conclusions:** Future research should focus on staff and patient experiences of care and inequalities in patients' access to care. Attention needs to be paid to the cost-effectiveness of the models and their sustainability, evaluation of their impact on patient outcomes by using comparators, and the use of risk-stratification tools.

**Protocol registration:** The review protocol was published on PROSPERO (CRD: 42020202888).

**Keywords:** remote home monitoring, virtual wards, COVID-19, silent hypoxia, rapid systematic review

## RESEARCH IN CONTEXT

### Evidence before this study

Remote home monitoring models for other conditions have been studied, but their adaptation to monitor COVID-19 patients and the analysis of their implementation constitute gaps in research.

### Added value of this study

The review covers a wide range of remote home monitoring models (pre-hospital as well as step-down wards) implemented in primary and secondary care sectors in eight countries and focuses on their implementation and impact on outcomes (including costs).

### Implications of all the available evidence

The review provides a rapid overview of an emerging evidence base that can be used to inform changes in policy and practice regarding the home monitoring of patients during COVID-19. Attention needs to be paid to the cost-effectiveness of the models and their sustainability, evaluation of their impact on patient outcomes by using comparators, and the use of risk-stratification tools.

## INTRODUCTION

COVID-19 has rapidly spread across the world, leading to high rates of mortality and unprecedented pressure on healthcare systems. Delays in the presentation of patients with COVID-19 has led to patients arriving as emergencies with very low oxygen saturation, often without accompanying breathlessness ('silent hypoxia')<sup>1</sup>. These delayed presentations of severe COVID-19 lead to extended hospital admissions for patients, often requiring invasive treatment and potential admission to intensive care units (ICU) or death<sup>2</sup>. Remote home monitoring models (sometimes referred to as 'virtual wards') have been established to: 1) avoid unnecessary hospital admissions (appropriate care at the appropriate place), and 2) escalate cases of deterioration at an earlier stage to avoid invasive ventilation and ICU admission<sup>3</sup>. Some of these models have integrated the use of pulse oximetry to monitor oxygen levels and identify and treat cases of 'silent hypoxia'<sup>2</sup>.

Remote home monitoring models have been implemented in the US, Australia, Canada, the Netherlands, Ireland, China and UK, with some variation in the frequency of patient monitoring, modality (a combination of telephone or video calls and use of applications or online portals), patient admission criteria, staffing models used for patient monitoring and level of clinical oversight, and use of pulse oximetry<sup>4-8</sup>.

There is a paucity of published literature on the models of care developed to implement remote home monitoring across different healthcare contexts during the COVID-19 pandemic, the experiences of staff implementing these models and patients receiving care, the use of data for monitoring progress, resources required, as well as the impact of these models on clinical, process and economic outcomes. The aim of this review was to address these gaps by identifying the nature and scale of remote home monitoring models implemented during COVID-19, their main components, processes of implementation, target patient populations and lessons learned. We sought to analyse and interpret evaluations of these models and their outcomes.

## METHODS

### Design

We followed the review method proposed by Tricco et al.<sup>9</sup>. The rapid review method follows a systematic review approach but proposes adaptations to some of the steps to reduce the amount of time required to carry out the review. We used a large multidisciplinary team to review abstracts and full texts, and extract data; in lieu of dual screening and selection, a percentage of excluded articles was reviewed by a second reviewer, and software was used for data extraction and synthesis<sup>9</sup>.

We used the Preferred Reporting Items for Systematic Reviews and Meta-Analysis (PRISMA) statement<sup>10</sup> to guide the reporting of the methods and findings. The review protocol was registered with PROSPERO (CRD: 42020202888, registered 6 August 2020).

### Research questions

The review sought to answer the following questions:

1. What are the aims and designs of remote home monitoring models?
2. What are the main stages involved in delivering remote home monitoring for COVID-19?
3. Which patient populations are considered appropriate for remote monitoring?
4. How is patient deterioration determined and flagged?
5. What are the expected outcomes of implementing remote home monitoring?
6. What is their impact on outcomes and costs?
7. What are the benefits and limitations of implementing these models?

## Search strategy

We used a phased search approach<sup>9</sup>. We carried out a series of search phases where we gradually added search terms based on the keywords used in the literature we identified. Appendix 1 includes the strategies used for each search phase, including the final search strategy. We searched for literature indexed in the following databases: MEDLINE, CINAHL PLUS, EMBASE, TRIP, medRxiv and Web of Science. Initial searches were carried out by CV on 9 July 2020 and updated on 21 August 2020, 21 September 2020 and 5 February 2021. Results were combined into Mendeley and duplicates were removed. The reference lists of included articles were manually screened to identify additional relevant publications.

## Study selection, inclusion and exclusion criteria

One researcher (CVP) screened the articles in the title phase, and additional researchers (KS) cross-checked exclusions in the abstract and full-text phases (KS, MS). Disagreements were discussed until consensus was reached. The inclusion criteria used for study selection was: 1) focus on the monitoring of confirmed or suspected patients with COVID-19, 2) focus on pre-hospital monitoring, monitoring after Emergency Department (ED) presentation and step-down wards for early discharge, 3) focus on monitoring at home (excluding monitoring done while the patient is in healthcare facilities), and 4) published in English. Due to the rapidly expanding evidence-base on COVID-19, we included a wide range of publications (i.e. feature articles, descriptions of services, preprints) and did not limit the selection to evaluations of remote home monitoring.

## Data extraction and management

The included articles were analysed using a data extraction form developed in REDCap (Research Electronic Data Capture) that extracted data on: the design and general characteristics of the model, patient populations, main reported process and clinical outcomes and its potential economic impact. The form was developed after the initial screening of full-text articles. It was then piloted independently by two researchers using a random sample of five articles (CV and KS). Disagreements were discussed until consensus was reached. The data extraction form was finalised based on the findings from the pilot. Data extraction was cross-checked by three researchers (TG, CSJ and ST).

## Data synthesis

Data were exported from REDCap and the main article characteristics were synthesised. The information entered in free text boxes was exported from REDCap and analysed using framework analysis<sup>11</sup>. The initial categories for the framework were informed by our research questions but we were also sensitive to topics emerging from the data.

## Quality assessment

Due to the descriptive nature of the articles and limited data in relation to study design, we did not assess the quality of the studies.

## RESULTS

The initial search yielded 902 articles (Figure 1). These were screened based on the title and abstract and type of article, resulting in 155 articles for full-text review. Full-text review of these articles led to 11 articles that met the inclusion criteria (reasons for exclusion can be found in Figure 1). Three additional articles were identified by reviewing the bibliography, two articles were identified in an updated search carried out on 21 September 2020, and eleven articles were added in an updated search carried out on 5 February 2021, ultimately leading to 27 articles included in the review. We excluded articles that focused on monitoring that took place within hospital settings (i.e. ICU) or for other non-COVID-19 related conditions.

**Figure 1.** Study selection process

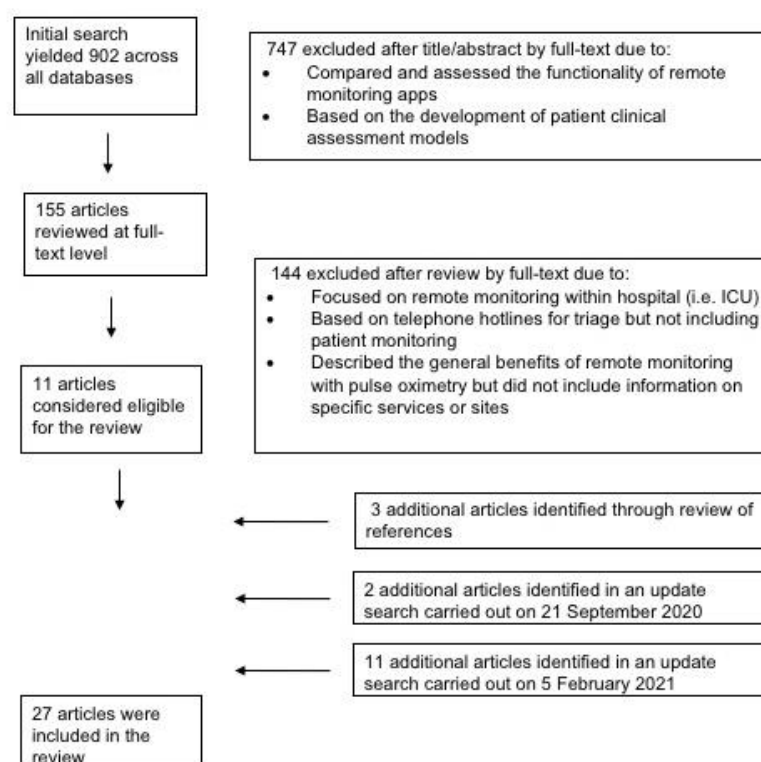

### **Characteristics of the included remote home monitoring models**

Eleven of the remote home monitoring models were implemented in the US, nine in the UK, two in Canada, two in the Netherlands and one each in China, Ireland, Brazil and Australia. Twelve of the articles described the service, six were identified as evaluations, seven as observational studies, one as a feasibility study and one (containing the example of two models) was a news feature (with a limited description of the services). Eighteen of the examples were published in peer-reviewed journals, nine were published in the form of preprints and one was a published conference abstract. The main characteristics of the included remote home monitoring examples are summarised in Appendix 2.

### **Aims and main designs of remote home monitoring models**

The primary aim of the remote home monitoring models was to enable the early identification of deterioration for patients self-managing COVID-19 symptoms at home (including those who had not been admitted to hospital as well as those who had been discharged). The programme theory guiding these models was that if patients were able to take the required regular observations whilst remaining at home and communicate these to the healthcare professionals responsible for their care, then cases of deterioration could be identified early and acted upon. These actions could include changing their treatment protocol, referring them to primary care or to the emergency department for assessment and potential admission to hospital. A secondary aim of the models was their use to reduce the rate of hospital infection and demand for beds in the acute care sector, where admission to hospital could be prevented for patients considered suitable to be managed at home and those who had been admitted to hospital could be discharged earlier but continue under the remote care of a medical team (a team that varied in composition depending on the model).

Most of the remote home monitoring models included in the review (23 examples) were led by teams in secondary care. Three examples were primary care led and two were led by both secondary and primary care. Thirteen of the models functioned as pre-admission

wards, in the sense that they sought to prevent the admission of patients to hospital or to identify cases of deterioration early (so those who should be referred could be admitted to hospital with lower rates of acuity). Five of the models functioned as “step-down” wards, that is, they were designed for patients who had been admitted to hospital (including ICU) where the medical team had identified that they could be discharged and safely monitored at home until their symptoms improved. Ten models functioned as pre-admission and step-down wards, organised according to two separate pathways.

### Patient populations considered appropriate for remote monitoring

Most of the models established a broad criteria for patient eligibility, defining the patient group as adult (over 18 yrs.) patients with COVID-19 symptoms (suspected and confirmed cases). Six of the models limited referrals to COVID-19 cases confirmed through testing<sup>6 12-15</sup>. The model described by Hutchings et al.<sup>6</sup> excluded patients over 65 years with significant comorbidities. Shah et al.<sup>16</sup> excluded pregnant women and only included patients with SpO<sub>2</sub> above 92% at initial assessment. We did not find any examples targeting socially and economically disadvantaged groups (although some models included support from social workers and mental health professionals)<sup>4 17</sup>. It is important to highlight that the size of the patient cohorts varied considerably (see Table 1 for patient numbers) and ranged from 12 patients to 6853. The models with the highest numbers of patients were implemented in the US. The comorbidities mentioned with greater frequency were hypertension, asthma and obesity.

**Table 1.** Main characteristics of monitored patients

|                     | <b>Number patients</b> | <b>Mean age</b>                                                   | <b>Most common comorbidities</b>               |
|---------------------|------------------------|-------------------------------------------------------------------|------------------------------------------------|
| Agarwal             | 97                     | Inconsistencies in reporting in the article (48.6, 43.6 and 43.8) | Asthma, hypertension, dyslipidemia and anxiety |
| Annis               | 2255                   | median 38*                                                        | NS                                             |
| Grutters            | 33                     | 57                                                                | NS                                             |
| Margolius           | 4213                   | 42                                                                | NS                                             |
| Lam                 | 50                     | median 44                                                         | hypertension, malignant disease                |
| Medina              | 878                    | NS                                                                | NS                                             |
| O'Keefe             | 496                    | 47.6                                                              | hypertension, obesity, asthma diabetes         |
| Shah                | 77                     | median 44                                                         | obesity and hypertension                       |
| Xu                  | 48                     | median 37.5                                                       | NS                                             |
| Hutchings           | 162                    | median 38                                                         | NS                                             |
| Kricke              | 6835                   | 47**                                                              | NS                                             |
| Ford                | 154                    | NS                                                                | NS                                             |
| Maghrabi            | 300                    | 57                                                                | Hypertension                                   |
| Thornton1 (Watford) | 1042                   | NS                                                                | NS                                             |
| Thornton2 (Reading) | 244                    | NS                                                                | NS                                             |
| Morgan              | 2348                   | 40-49                                                             | NS                                             |
| O'Carroll           | 18                     | median 48                                                         | NS                                             |
| Bell                | 192                    | median 43                                                         | NS                                             |
| Gaeta               | 488                    | NS                                                                | NS                                             |

|                 |                  |             |                       |
|-----------------|------------------|-------------|-----------------------|
| Gordon          | 225              | Median 54   | NS                    |
| Kodama          | 50               | NS          | NS                    |
| Nunan           | 273              | median 50.3 | NS                    |
| Pereira         | 12 (COVID-19+ve) | 37.2        | Obesity, hypertension |
| Silven          | 55               | NS          | NS                    |
| Francis         | 900              | 54.9        | Diabetes, Asthma      |
| Vindrola-Padros | 2084             | NS          | NS                    |
| Wilcock         | 41               | 45.9        | NS                    |
| Clarke          | 908              | 54          | NS                    |

\*For the subset of 1496 patients who completed the programme; \*\* for a subset of 6,006 who completed a survey  
NS=not specified

### Stages of remote home monitoring

The articles described five main stages in remote home monitoring for COVID-19: 1) referral and triage to determine eligibility, 2) onboarding of patient to remote home monitoring service (provision of information to patient and/or carer on monitoring process, mechanisms for escalation and self-care), 3) monitoring (including recording of observations, communication of the information, assessment of the information by the medical team), 4) escalation (if required), and 5) discharge from the pathway.

Patient information recorded at triage included:

- Patient demographics (age, sex, race/ethnicity, insurance type in the models in the US)
- Clinical variables (clinical signs and symptoms, medical history and medications)
- Health data for risk assessment and vital signs data (body temperature, heart rate, respiratory rate and oxygen saturation)

Three studies included some degree of detail in relation to the categorisation of patients in relation to risk<sup>14 17 18 19</sup>. O’Keefe and colleagues<sup>12</sup> described and evaluated a risk assessment model based on age, medical history and symptom severity. This model was able to identify the need for hospitalisation in initially non-severe COVID-19 patients.

In ten of the examples included in the review, monitoring was based on patient record of observations using a paper-based system and then communicating the information to a member of the medical team by telephone (see Appendix 2). Twelve of the examples relied on the use of an online mechanism, either through an app or online form. Three examples offered patients a telephone or an app option<sup>20</sup>. Another example relied on the use of wearable sensors to continuously monitor temperature readings and transfer these to the medical team<sup>6</sup>. Twenty of the models relied on the use of pulse oximetry from the beginning of implementation, four models did not use pulse oximetry, one model added pulse oximetry three weeks after implementation and two articles indicated that the use of pulse oximetry was being considered in the near future.

Escalation was actioned depending on pre-established thresholds. Not all articles have reported thresholds for escalation and most only refer to the worsening of symptoms. Shah et al.<sup>16</sup> indicated that patients on their remote home monitoring pathway were flagged as deteriorating if reporting SpO<sub>2</sub> below 92% after a double reading. Xu et al.<sup>21</sup> used a SpO<sub>2</sub> reading of below 93% or BP less than 90/60 mmHg. Some of the examples included in the



review established safety-netting options in cases when patients could not be reached via phone such as calling the police so they could visit the patient at home<sup>6</sup>.

Most patients were followed-up until their symptoms improved or the patient opted out of the pathway. Medina et al.<sup>13</sup> reported following up patients on the step-down pathway for 7 days post-discharge from hospital and those on the pre-admission pathway for 14 days. Shah et al.<sup>16</sup> followed-up patients on their pre-admission pathway for 7 days. Hutchings et al.<sup>6</sup> referred patients to their GP for follow-up after discharging them from the remote home monitoring pathway.

### Expected outcomes of implementing remote home monitoring

The outcomes recorded in each remote home monitoring model are listed in Appendix 2. They can be grouped in three main categories: 1) process outcomes related to the remote home monitoring pathway, 2) process outcomes related to secondary care and 3) patient outcomes (including clinical and experience). Process outcomes related to the remote home monitoring pathway included: time from swab to assessment, time to escalation and ambulance attendance/emergency activation (i.e. calling 999 or 911). Process outcomes related to secondary care included length of stay. Outcomes considered at the patient level included: emergency department attendance/reattendance, hospital admission, ICU admission, readmission, mortality, ventilation or non-invasive ventilation needs, and patient satisfaction.

### Impact on outcomes

It was difficult to carry out an analysis of the impact of remote home monitoring across all examples because not all articles reported data on the same outcomes (Table 2). Mortality rates were low, admission or readmission rates ranged from 0 to 29%, and ED attendance or reattendance ranged from 4 to 36%. Six of the models reported data on patient feedback, with high satisfaction rates<sup>5 8 18 22 23 24 25 26</sup>.

Remote home monitoring process outcomes were only included in six of the articles, with time from swab to assessment ranging from 2 to 3.7 days<sup>12 17 20</sup> and virtual length of stay from 3.5 days to 13 days (see Table 2). Only one article presented findings on reduction in length of stay, calculated at 5 days fewer per patient<sup>26</sup>.

**Table 2.** Impact of remote home monitoring on selected outcomes

|            | virtual LoS                                | Escalation                               | ED attendance/<br>reattendance | Admission/<br>readmission | Mortality                                   |
|------------|--------------------------------------------|------------------------------------------|--------------------------------|---------------------------|---------------------------------------------|
| Agarwal    | 8 days (median)                            | 5.10%                                    | 4.2%                           | 0                         | NS                                          |
| Annis      | NS                                         | NS                                       | 4.0%                           | 0.6%                      | NS                                          |
| Grutters*  | 13 days (mean)                             | 18 patients<br>reassessed<br>in hospital | NS                             | 9%**                      | 0                                           |
| Margolius* | NS                                         | NS                                       | 7%                             | 1%                        | NS                                          |
| Lam        | 12.5 days (only<br>for 52% of<br>patients) | 12%                                      | NS                             | 8%                        | 0                                           |
| Medina     | NS                                         | 10%                                      | NS                             | 2%, 3%**                  | 9 patients but<br>denominator is<br>unclear |
| O'Keefe    | 13.1 days                                  | NS                                       | NS                             | 7.1%                      | NS                                          |
| Shah       | NS                                         | 25%                                      | 36%                            | 29%                       | 2.6%                                        |
| Xu         | NS                                         | NS                                       | NS                             | NS                        | 0                                           |
| Hutchings  | 8 days (only for<br>62 of the              | 5 patients                               | 2.5%                           | 1.9%                      | 0                                           |

|                     | patients in the sample) |                                                                                             |        |            |          |
|---------------------|-------------------------|---------------------------------------------------------------------------------------------|--------|------------|----------|
| Kricke              | NS                      | NS                                                                                          | 7.7%   | NS         | NS       |
|                     |                         | 14.3% referred to physician review; 3.9% physician to patient call; 2.6% to ED and admitted |        |            |          |
| Ford                | NS                      |                                                                                             | 2.6%   | 2.6%       | NS       |
| Maghrabi            | 3.5 days (median)       | NS                                                                                          | 13%    | 9%**       | 0.66%    |
| Thornton1 (Watford) | NS                      | NS                                                                                          | NS     | NS         | NS       |
| Thornton2 (Reading) | NS                      | NS                                                                                          | 11.9%  | 7.4%       | 0        |
| Morgan              | 12.7 days (mean)        | 16.9% escalated to nurse review                                                             | 7.9%   | 3.4%       | NS       |
| O'Carroll           | 12 days (median)        | NS                                                                                          | NS     | 4 patients | NS       |
| Bell                | NS                      | NS                                                                                          | 16.7%  | 3.6%       | 0        |
| Gaeta               | NS                      | NS                                                                                          | 18.4%  | 8.8%       | 1.2%     |
| Gordon              | unclear                 | NS                                                                                          | 4.9%   | 1.3%       | NS       |
| Kodama              | NS                      | 26%                                                                                         | 6%**** | 2%****     | NS       |
| Nunan               | NS                      | NS                                                                                          | 11.4%  | 7.0%       | 0.4%     |
| Pereira             | NS                      | NS                                                                                          | NS     | NS         | NS       |
| Silven              | NS                      | NS                                                                                          | NS     | 9%         | 0        |
| Francis             | NS                      | NS                                                                                          | NS     | 8.1%       | 2.0%     |
| Vindrola-Padros     | NS                      | 10.4%                                                                                       | 8.3%   | 6.4%       | 1.1%     |
| Wilcock             | 10.3 days (mean)        | NS                                                                                          | NS     | 7.3%       | 1.9% *** |
| Clarke              | NS                      | NS                                                                                          | 5.7%   | 4.4%       | 3.1%     |

\*included data for patients on remote home monitoring pathway, \*\*refers to readmission in cases of step-down, wards, \*\*\*of 52 initially recruited, \*\*\*\* these refer to very low patient numbers. LoS=length of stay, ED= emergency department, NS= not specified or not able to calculate based on data reported in the manuscript.

### The economic impact

Very few of the selected studies for this rapid review provided a descriptive form of economic analysis, though some of them mentioned the potential for cost savings based on the utilisation of virtual monitoring programs for other treatments in similar settings<sup>14 22 26</sup>. The study by Nunan and colleagues<sup>22</sup> found that setting up a remote oximetry monitoring at the Royal Berkshire Hospital resulted in cost avoidance (in terms of bed days, saturation probes and staffing wages) that amounted to £107,600 per month. The amount spent per patient on remote monitoring varied by country and type of costs included in the analysis. The study from Gaeta and colleagues<sup>27</sup> reported a total cost of \$621.8K (equivalent of £485.0K using purchasing power parity) for 621 COVID-19 patients that were monitored using outpatient telehealth follow-up in the Brooklyn Methodist Hospital. These costs included also costs of inpatient follow-up and averaged at £781.0 per monitored patient, whereas the mean cost per monitored patient reported in England varied from £400 to £553 for step-down and pre-hospital models respectively<sup>24</sup>. Some of the selected studies highlighted the fact that, during the pandemic, the intervention used existing resources and staff that were made available due to the emergency situation<sup>7 12 14 28</sup>. However, they also

highlighted that, with the return to normal workloads in the health care system, a question of allocation of resources and sufficient staffing still remains.

## DISCUSSION

In this article we have sought to make a contribution to the rapidly growing evidence-base on the use of remote home monitoring models for patients with confirmed or suspected COVID-19 (see box 1 for key lessons). The review has pointed to factors that need to be taken into consideration in relation to the design of these models. Most of the models included in the study were led by secondary care but some authors argued that coordination between primary and secondary care could facilitate the implementation of remote home monitoring pathways<sup>5 7 13</sup>. Primary care led models might be more adaptable to evolving patient and system needs and easier to replicate in contexts with limited secondary care access and capacity<sup>17</sup>. Three models integrated mental health and social care support during and after patient monitoring, highlighting a wide range of patient needs<sup>6 13 17</sup>.

### **Box 1.** Key lessons in the implementation of remote home monitoring models during the COVID-19 pandemic

- It is important to consider remote home monitoring models as an approach to maintain patients safe in the right setting.
- The use of apps for monitoring allowed the follow-up of a higher number of patients (compared to paper-based models), but some of the studies indicated that models based on telephone calls were more inclusive (i.e. including patients without internet access or technological literacy).
- Patient/carer training was identified as a key determining factor of the success of these models.
- Coordination between primary and secondary care facilitated implementation
- Primary care led models were considered, in some cases, as more adaptable to evolving patient and system needs, and easier to replicate in contexts with limited secondary care access and capacity.
- A few models integrated mental health and social care support during and after patient monitoring, highlighting a wide range of patient needs.

Despite several of the examples used apps and other types of online platforms, discussions in relation to the use of health technology were limited. The use of apps for monitoring allowed the follow-up of a higher number of patients (compared to paper-only models) but some of the studies indicated that models based on telephone calls were more inclusive (i.e. including patients without internet access or technological literacy)<sup>19</sup>. Patient experience was captured in some of the examples we reviewed<sup>8 26</sup> but the analysis was limited. An analysis of patient experience and engagement is important as the literature on the use of remote patient monitoring for other conditions has demonstrated that higher levels of patient engagement with remote patient monitoring technology are associated with better patient outcomes<sup>29</sup>.

Similarly to other reviews on remote patient monitoring in other conditions, another limitation was the lack of attention placed on the implementation of the models and the failure to identify the programme theories guiding their design, factors that acted as barriers and facilitators and the extent to which the pathways were implemented according to their original plans<sup>30</sup>. This could be due to the limited evidence on COVID-19 and the management of patients with this disease at the time of designing and implementing these models as well as the general limited use of programme theories in the design of healthcare interventions that has already been documented in the literature<sup>31</sup>.

Emerging international evidence has indicated that lower thresholds for oxygen saturation, are associated with worse patient outcomes<sup>2 32</sup>. In the case of our review, even though some

authors argued that pulse oximetry identified the need for hospitalisation when using a cut-off of 92%<sup>16</sup>, we could not reach conclusions in relation to patient safety and the degree to which remote home monitoring models can conclusively identify cases of deterioration at an earlier stage in the disease trajectory. The main reasons were lack of standardised reporting across articles in relation to these outcome measures and how these were measured, as well as the limitation that none of the articles used comparators.

Issues with using pulse oximetry were also highlighted such as: patient physiological measures needed to be recorded several times a day to correctly identify cases of deterioration, some remote home monitoring examples used standardised home pulse oximeters to avoid variability between different brands, pulse oximetry readings were made less accurate by nail polish, severe anaemia, hyperbilirubinemia, hemoglobinopathies, or poor peripheral perfusion from severe vasoconstriction or poor cardiac output<sup>16 33</sup>. Some authors also argued that patient training was a key determining factor of the success of health information technology as it ensured readings and other observations were carried out accurately<sup>6</sup>. Remote home monitoring needed to be seen as an approach to maintain patients safely in the right setting rather than as an admission avoidance model.

Remote home monitoring for COVID-19 patients was expected to have a positive economic impact, mainly due to costs savings in staff time and PPE utilisation, avoidance of infection of frontline medical staff and reduced hospitalisations<sup>14 21</sup>. However, the economic evidence in relation to these was limited. Very few of the selected studies included a simple descriptive form of economic analysis which included the cost per patient and the cost avoidances of using remote monitoring for patients with COVID-19. The selected studies have, however, raised the issue of resource allocation and funding, especially when it comes to the continuity of such programs after the first emergency situation. Most of the staff who worked on remote monitoring interventions for COVID-19 came from other services and the resources used were already existing. Yet, with the return to normal workloads, providing sufficient staff and enough resources may become a problem. Previous studies have indicated that remote monitoring in itself has contributed to increased efficiency in the use of resources (such as reduction in length of stay, increasing bed availability without compromising patient care safety, etc.)<sup>15 21</sup>. A complete economic analysis in this context could indicate if remote home monitoring for COVID-19 patients is a cost-effective intervention and could help inform accurate planning of the needed resources and staff. This economic analysis would also need to include costs and benefits beyond the actual remote home monitoring models, a reliable control group, as well as a longer follow up period.

This review has a series of limitations. The last search was carried on 5 February 2021, so any articles published after this date were not included. We have included preprints as a way to address delays produced by external review and publication. Furthermore, although we employed multiple broad search terms, it is possible that we missed articles that did not use these terms. Due to the variability in study designs and the descriptive nature of the articles we did not assess these for quality using standardised tools for assessment. However, we feel it is important to note that we found several cases of missing data and inconsistencies in the reporting of evaluations that would lead to low quality ratings.

The review pointed to several future areas of research. These could include an analysis of patient experience, beyond measures of satisfaction and the exploration of potential inequalities in patients' access to remote home monitoring models or patients' difficulties interacting with technology. Technological barriers have been reported in other studies of remote home monitoring and should not be overlooked when exploring the experiences of patients with COVID-19<sup>34 35</sup>. Additional attention needs to be paid to the processes used to implement these models and how these might vary based on the healthcare sector, patient population, size, wave of the pandemic and approaches used for triage, monitoring and escalation. As mentioned earlier, primary care might need to play a more central role in the

coordination of remote patient monitoring models, providing more holistic care for patients and reducing the demand on hospital services<sup>36</sup>. The evaluation of remote home monitoring, considering its impact on patient outcomes through the use of comparators is also required. We also need to consider the sustainability of these models during multiple epidemiological peaks, compare different approaches to remote home monitoring and assess their cost-effectiveness.

### **Declaration of competing interests**

All authors have completed the ICMJE uniform disclosure form at [www.icmje.org/coi\\_disclosure.pdf](http://www.icmje.org/coi_disclosure.pdf) and declare: NJF, ST, TG, CSJ, CVP, MS, KS had financial support for the submitted work from NIHR (Health Services and Delivery Research, 16/138/17 – Rapid Service Evaluation Research Team; The Birmingham, RAND and Cambridge Evaluation (BRACE) Centre Team (HSDR16/138/31) and NJF is an NIHR Senior Investigator; no financial relationships with any organisations that might have an interest in the submitted work in the previous three years; no other relationships or activities that could appear to have influenced the submitted work. The views and opinions expressed therein are those of the authors and do not necessarily reflect those of the HS&DR, NIHR, NHS or the Department of Health and Social Care.

### **Contributor and guarantor information**

NJF, CSJ, TG, KS, MS, SMT and CVP contributed to the design of the review. MB, KS and CVP participated in the study screening, selection and data extraction. CSJ, TG and SMT acted as cross-checkers of the extracted data. NJF, MIK, AS and KK reviewed and provided feedback on the manuscript. All authors approved the final version of the manuscript. The corresponding author attests that all listed authors meet authorship criteria and that no others meeting the criteria have been omitted.

### **Dissemination declaration**

The findings from this review will be disseminated widely, including to patient organisations.

### **Data sharing statement**

All of the relevant data are included in the manuscript and supplementary files.

### **Patient and public engagement statement**

Patients or the public were not involved in the design, or conduct, or reporting, or dissemination plans of our research.

## REFERENCES

1. Levitan RM. Pulse Oximetry as a Biomarker for Early Identification and Hospitalization of COVID-19 Pneumonia. *Academic Emergency Medicine* 2020;27(8):785-86. doi: 10.1111/acem.14052
2. Goyal D. Oxygen and mortality in COVID-19 pneumonia: a comparative analysis of supplemental oxygen policies and health outcomes across 26 countries. *medRxiv* 2020:2020.07.03.20145763. doi: 10.1101/2020.07.03.20145763
3. NHS. Pulse oximetry to detect early deterioration of patients with COVID-19 in primary and community care settings, 2020.
4. Margolius D, Hennekes M, Yaho J, et al. On the Front (Phone) Lines: Results of a COVID-19 Hotline in Northeast Ohio. *medRxiv* 2020:2020.05.08.20095745. doi: 10.1101/2020.05.08.20095745
5. Thornton J. The “virtual wards” supporting patients with covid-19 in the community. *BMJ : British Medical Journal (Online)* 2020;369 doi: <http://dx.doi.org/10.1136/bmj.m2119>
6. Hutchings O, Dearing C, Jagers D, et al. Virtual health care for community management of patients with COVID-19. *medRxiv* 2020:2020.05.11.20082396. doi: 10.1101/2020.05.11.20082396
7. Kricke G, et al. Rapid Implementation of an Outpatient Covid-19 Monitoring Program. *NEJM* 2020 doi: 10.1056/CAT.20.0214.
8. Annis T, Pleasants S, Hultman G, et al. Rapid implementation of a COVID-19 remote patient monitoring program. *Journal of the American Medical Informatics Association* 2020;27(8):1326-30. doi: 10.1093/jamia/ocaa097
9. Tricco A, et al. . Rapid reviews to strengthen health policy and systems: A Practical Guide, 2017.
10. Moher D, Liberati A, Tetzlaff J, et al. Preferred Reporting Items for Systematic Reviews and Meta-Analyses: The PRISMA Statement. *PLOS Medicine* 2009;6(7):e1000097. doi: 10.1371/journal.pmed.1000097
11. Gale NK, Heath G, Cameron E, et al. Using the framework method for the analysis of qualitative data in multi-disciplinary health research. *BMC Medical Research Methodology* 2013;13(1):117. doi: 10.1186/1471-2288-13-117
12. O'Keefe JB, Tong EJ, Taylor TH, et al. Initial Experience in Predicting the Risk of Hospitalization of 496 Outpatients with COVID-19 Using a Telemedicine Risk Assessment Tool. *medRxiv* 2020:2020.07.21.20159384. doi: 10.1101/2020.07.21.20159384
13. Medina M, Babiuch C, Card M, et al. Home monitoring for COVID-19. *Cleve Clin J Med* 2020 doi: 10.3949/ccjm.87a.ccc028
14. Ford D, Harvey JB, McElligott J, et al. Leveraging Health System Telehealth and Informatics Infrastructure to Create a Continuum of Services for COVID-19 Screening, Testing, and Treatment. *Journal of the American Medical Informatics Association* 2020 doi: 10.1093/jamia/ocaa157
15. Carroll O, MacCann R, Reilly A, et al. Remote monitoring of oxygen saturation in individuals with COVID-19 pneumonia. *European Respiratory Journal* 2020;56(2):2001492. doi: 10.1183/13993003.01492-2020
16. Shah S, Majmudar K, Stein A, et al. Novel Use of Home Pulse Oximetry Monitoring in COVID-19 Patients Discharged From the Emergency Department Identifies Need for Hospitalization. *Academic Emergency Medicine* 2020;27(8):681-92. doi: 10.1111/acem.14053
17. Agarwal P, Mukerji G, Laur C, et al. COVIDCare@Home: Lessons from a Family Medicine Led Remote Monitoring Program. *medRxiv* 2020:2020.07.20.20158386. doi: 10.1101/2020.07.20.20158386
18. Maghrabi ea. The Development and Implementation of a Virtual Discharge Ward for Patients with COVID-19 Pneumonia: Data on The First 300 Patients. 2020
19. Bell LC, Norris-Grey C, Luintel A, Bidwell G, Lanham D, Marks M, Baruah T, O'Shea L, Heightman M, Logan S. Implementation and evaluation of a COVID-19 rapid follow-

- up service for patients discharged from the emergency department. *Clinical Medicine*. 2021 Jan;21(1):e57.
20. Lam PW, Sehgal P, Andany N, et al. A virtual care program for outpatients diagnosed with COVID-19: a feasibility study. *CMAJ Open* 2020;8(2):E407-E13. doi: 10.9778/cmajo.20200069
  21. Xu H, Huang S, Qiu C, et al. Monitoring and Management of Home-Quarantined Patients With COVID-19 Using a WeChat-Based Telemedicine System: Retrospective Cohort Study. *J Med Internet Res* 2020;22(7):e19514. doi: 10.2196/19514 [published Online First: 2.7.2020]
  22. Nunan J, Clarke D, Malakouti A, Tannetta D, Calthrop A, Xu XH, Chan NB, Khalil R, Li W, Walden A. Triage Into the Community for COVID-19 (TICC-19) Patients Pathway-Service evaluation of the virtual monitoring of patients with COVID pneumonia. *Acute medicine*. 2020 Jan 1;19(4):183-91.
  23. Wilcock J, Grafton-Clarke C, Coulson T. What is the value of community oximetry monitoring in people with SARS-CoV-2? A prospective, open-label clinical study. medRxiv. 2021 Jan 1.
  24. Vindrola-Padros C, Sidhu MS, Georghiou T, Sherlaw-Johnson C, Singh KE, Tomini SM, Ellins J, Morris S, Fulop NJ. The implementation of remote home monitoring models during the COVID-19 pandemic in England. medRxiv. 2020 Jan 1.
  25. Kodama R, Arora S, Anand S, Choudhary A, Weingarten J, Francesco N, Chiricolo G, Silber S, Mehta PH. Reengineering the Discharge Transition Process of COVID-19 Patients Using Telemedicine, Remote Patient Monitoring, and Around-the-Clock Remote Patient Monitoring from the Emergency Department and Inpatient Units. *Telemedicine and e-Health*. 2020 Dec 14.
  26. Grutters LA, Majoor KI, Mattern ESK, et al. Home telemonitoring makes early hospital discharge of COVID-19 patients possible. *J Am Med Inform Assoc* 2020:ocaa168. doi: 10.1093/jamia/ocaa168
  27. Gaeta T, Chiricolo G, Mendoza C, Vaccari N, Melville L, Melniker L, Bove J. 124 Impact of a Novel Telehealth Follow-Up Protocol for At-Risk Emergency Department Patients Discharged With Presumptive or Confirmed COVID-19. *Annals of Emergency Medicine*. 2020 Oct;76(4):S49.28.
  28. Morgan ea. Remote monitoring of patients with COVID-19: Design, implementation and outcomes of the first 3,000 patients in COVID Watch. *NEJM* 2020
  29. Su D, Michaud TL, Estabrooks P, et al. Diabetes Management Through Remote Patient Monitoring: The Importance of Patient Activation and Engagement with the Technology. *Telemedicine and e-Health* 2018;25(10):952-59. doi: 10.1089/tmj.2018.0205
  30. Kew KM, Cates CJ. Home telemonitoring and remote feedback between clinic visits for asthma. *Cochrane Database of Systematic Reviews* 2016(8) doi: 10.1002/14651858.CD011714.pub2
  31. Davidoff F, Dixon-Woods M, Leviton L, et al. Demystifying theory and its use in improvement. *BMJ Quality & Safety* 2015;24(3):228. doi: 10.1136/bmjqs-2014-003627
  32. Majumdar SR, Eurich DT, Gamble J-M, et al. Oxygen Saturations Less than 92% Are Associated with Major Adverse Events in Outpatients with Pneumonia: A Population-Based Cohort Study. *Clinical Infectious Diseases* 2011;52(3):325-31. doi: 10.1093/cid/ciq076
  33. Luks AM, Swenson ER. Pulse Oximetry for Monitoring Patients with COVID-19 at Home. Potential Pitfalls and Practical Guidance. *Annals of the American Thoracic Society* 2020;17(9):1040-46. doi: 10.1513/AnnalsATS.202005-418FR
  34. McGillicuddy JW, Weiland AK, Frenzel RM, et al. Patient Attitudes Toward Mobile Phone-Based Health Monitoring: Questionnaire Study Among Kidney Transplant Recipients. *J Med Internet Res* 2013;15(1):e6. doi: 10.2196/jmir.2284 [published Online First: 08.01.2013]



35. Seto E, Leonard KJ, Masino C, et al. Attitudes of Heart Failure Patients and Health care Providers towards Mobile Phone-Based Remote Monitoring. *J Med Internet Res* 2010;12(4):e55. doi: 10.2196/jmir.1627 [published Online First: 29.11.2010]
36. Park, S. et al. Strengthening the UK primary care response to COVID-19. *BMJ* 2020; 370.
37. Gordon WJ, Henderson D, DeSharone A, Fisher HN, Judge J, Levine DM, MacLean L, Sousa D, Su MY, Boxer R. Remote Patient Monitoring Program for Hospital Discharged COVID-19 Patients. *Applied clinical informatics*. 2020 Oct;11(05):792-801.
38. Motta LP, Silva PP, Borguezan BM, Amaral JL, Milagres LG, Boia MN, Ferraz MR, Mogami R, Nunes RA, de Melo PL. An emergency system for monitoring pulse oximetry, peak expiratory flow and body temperature of patients with COVID-19 at home: Development and preliminary application. medRxiv. 2020 Jan 1.
39. Silven AV, Petrus AH, Villalobos-Quesada M, Dirikgil E, Oerlemans CR, Landstra CP, Boosman H, van Os HJ, Blanker MH, Treskes RW, Bonten TN. Telemonitoring for patients with COVID-19: recommendations for design and implementation. *Journal of Medical Internet Research*. 2020 Sep 2;22(9):e20953.
40. Francis NA, Stuart B, Knight M, Vancheeswaran R, Oliver C, Willcox M, Barlow A, Moore M. Predictors of adverse outcome in patients with suspected COVID-19 managed in a virtual hospital setting: a cohort study. medRxiv. 2020 Jan 1.
41. Clarke J, Flott K, Crespo RF, Ashrafian H, Fontana G, Bengner J, Darzi A, Elkin S. Assessing the Safety of Home Oximetry for Covid-19: A multi-site retrospective observational study. medRxiv. 2020 Jan 1.

## **Appendix 1.** Phased search strategies

COVID-19

AND

“virtual ward” OR “remote monitoring” OR “virtual monitoring” OR “home monitoring” OR  
“community monitoring” OR “early monitoring”

COVID-19 OR

AND

“virtual ward” OR “remote monitoring” OR “virtual monitoring” OR “home monitoring” OR  
“community monitoring” OR “early monitoring” OR “pre-hospital monitoring”

AND

“silent hypoxemia” OR “pulse oximetry”

"COVID-19"[All Fields] OR "severe acute respiratory syndrome coronavirus 2"[All Fields]  
OR "severe acute respiratory syndrome coronavirus 2"[All Fields] OR "2019-nCoV"[All  
Fields] OR "SARS-CoV-2"[All Fields] OR (("Wuhan"[All Fields] AND ("coronavirus"[MeSH  
Terms] OR "coronavirus"[All Fields])) AND 2020[All Fields])

AND

“virtual ward” OR “remote monitoring” OR “virtual monitoring” OR “home monitoring” OR  
“community monitoring” OR “early monitoring” OR “remote patient monitoring” OR “pre-  
hospital monitoring” OR “Covidom” OR “My m health” OR “GetWell Loop” [All Fields]

AND

“silent hypoxemia” OR “pulse oximetry” [All Fields]

**Appendix 2.** Characteristics of the included remote home monitoring examples

| Author               | Country | Type of study and article                                     | Type of model               | Terms               | Sector | Patient population                                                                                                       | Triage process                                                                                                                                                                                           | Recorded patient info                                                                                                                                                                                                                                                                                                                                                         | Patient reporting tool                                                | Patient monitoring tool                                                                                                                    | Outcomes                                                                                                                                                                                                                                                                                                    |
|----------------------|---------|---------------------------------------------------------------|-----------------------------|---------------------|--------|--------------------------------------------------------------------------------------------------------------------------|----------------------------------------------------------------------------------------------------------------------------------------------------------------------------------------------------------|-------------------------------------------------------------------------------------------------------------------------------------------------------------------------------------------------------------------------------------------------------------------------------------------------------------------------------------------------------------------------------|-----------------------------------------------------------------------|--------------------------------------------------------------------------------------------------------------------------------------------|-------------------------------------------------------------------------------------------------------------------------------------------------------------------------------------------------------------------------------------------------------------------------------------------------------------|
| Margolius            | USA     | Evaluation/ Preprint                                          | Pre-admission               | Telehealth services | PC     | C19 symptoms                                                                                                             | Patient referred to teleconsultation and follow-up call made 24 hours after                                                                                                                              | <p><b>Data for risk assessment:</b><br/>age, sex, race/ethnicity, insurance type, smoking status and clinical variables directly relevant to understanding the social epidemiology of the COVID-19 hotline (symptom protocols, visit disposition, visit diagnoses).</p> <p><b>Data for monitoring:</b><br/>change in symptoms (including temperature), basic living needs</p> | Paper-based                                                           | Telephone call                                                                                                                             | (1) emergency room visit likely related to COVID-19 subsequent to hotline telehealth visit, (2) hospitalization due to COVID-19 subsequent to hotline telehealth visit, (3) SARSCoV-2 PCR test ordered subsequent to telehealth visit, and (4) positive SARS-CoV-2 PCR test subsequent to telehealth visit. |
| Maghrabi*            | UK      | Description of the service/ Preprint                          | Step-down ward              | Virtual ward        | SC     | Discharged patients with suspected or confirmed COVID-19                                                                 | Patients where there were concerns about oxygenation were discharged with a pulse oximeter and onboarded on to the virtual ward.                                                                         | <p><b>Data for monitoring:</b><br/>symptom improvement, stability or deterioration (including oxygen saturation)</p>                                                                                                                                                                                                                                                          | Patients received daily phone calls and asked standardised questions. | Patients referred through an electronic form on the EHR, monitoring data were inputted directly on the EHR and auto-populated a dashboard. | LoS on virtual ward and in hospital, O <sub>2</sub> requirements, readmission, reattendance, mortality and patient satisfaction.                                                                                                                                                                            |
| Thornton1 (Watford)* | UK      | Description of the service in news feature/ Published article | pre-admission and step-down | Virtual ward        | SC     | Patients presenting at ED with symptoms and admitted patients who needed additional monitoring at the point of discharge | Patient assessed in ED and triaged to virtual ward with pulse oximeter. Patients where there were concerns about oxygenation were discharged with a pulse oximeter and onboarded on to the virtual ward. | <p><b>Data for risk assessment:</b><br/>patient-reported data (clinical signs and symptoms, medical history and medications)</p> <p><b>Data for monitoring:</b><br/>symptoms, temperature, and their oxygen level.</p>                                                                                                                                                        | Online: App (Medopad) + phone calls (phase 1 of the service)          | Medopad app                                                                                                                                | ED reattendance, admission/readmission, mortality                                                                                                                                                                                                                                                           |

|                             |           |                                                                  |                             |                                                                      |    |                                                                                                                                                                    |                                                                                                                                                                                                                                                                                   |                                                                                                                                                                                                                                                                                                                              |                                                                                                                                                                                                                                                     |                                                                                                                                                                                                                                                                                                 |                                                                                                             |
|-----------------------------|-----------|------------------------------------------------------------------|-----------------------------|----------------------------------------------------------------------|----|--------------------------------------------------------------------------------------------------------------------------------------------------------------------|-----------------------------------------------------------------------------------------------------------------------------------------------------------------------------------------------------------------------------------------------------------------------------------|------------------------------------------------------------------------------------------------------------------------------------------------------------------------------------------------------------------------------------------------------------------------------------------------------------------------------|-----------------------------------------------------------------------------------------------------------------------------------------------------------------------------------------------------------------------------------------------------|-------------------------------------------------------------------------------------------------------------------------------------------------------------------------------------------------------------------------------------------------------------------------------------------------|-------------------------------------------------------------------------------------------------------------|
| Thornton2<br>(Reading)<br>* | UK        | Description of the service in news feature/<br>Published article | pre-admission and step-down | Virtual ward                                                         | SC | Patients presenting at ED with symptoms or referred from primary care. Also included admitted patients who needed additional monitoring at the point of discharge. | Patient assessed in ED and triaged to virtual ward with oximeter. Patients where there were concerns about oxygenation were discharged with a pulse oximeter and onboarded on to the virtual ward.                                                                                | <b>Data for risk assessment:</b><br>patient-reported data (clinical signs and symptoms, medical history and medications)<br><br><b>Data for monitoring:</b><br>symptoms, temperature, oxygen saturation level.                                                                                                               | Paper-based (patient recorded information at home and reported it to the medical team over the phone)                                                                                                                                               | Phone call with medical team. Patients asked to do stress test and report O <sub>2</sub> sats level                                                                                                                                                                                             | ED reattendance, admission/readmission, mortality, patient satisfaction                                     |
| Hutchings<br>*              | Australia | Observational study/<br>Preprint                                 | Pre-admission               | Virtual health care, remote patient monitoring                       | SC | Patients in whom C19 is detected (certain inclusion and exclusion criteria apply)                                                                                  | Patients attend COVID-19 testing clinic, those in whom the virus is detected are referred to the virtual care centre by the local public health unit. The care centre conducts an initial assessment to ascertain suitability for virtual health care – this is done by telephone | <b>Data for risk assessment:</b><br>patient-reported data (clinical signs and symptoms, medical history and medications)<br><br><b>Data for monitoring:</b><br>vital signs - respiratory rate, oxygen saturation, pulse rate and temperature, assessment of other symptoms and signs of deterioration assessed by video call | Online: Wearable temperature monitor provides continuous temperature monitoring, which feed into a dashboard. Pulse oximeter readings read directly from the device. Video consultations used to confirm vital signs collected by wearable devices. | Wearable temperature monitor provides continuous temperature monitoring, which feed into a dashboard. Patients monitored three times a day, including a videoconference twice every 24 hours. Video consultations comprised most contacts with telephone consultations making up the remainder. | Ambulance attendance, ED attendance, ED admission, mortality                                                |
| Kricke                      | USA       | Description of service/<br>Published article                     | Pre-admission               | Home monitoring, outpatient monitoring, community based virtual care | SC | Patients added to the registry were those with pending/indefinite/positive COVID-19 test or presumed presence                                                      | States only nurses from COVID-19 triage phone line, ED staff, and hospital medicine staff were able to add patients to the registry.                                                                                                                                              | <b>Data for risk assessment:</b><br>Evaluation of 10 symptoms – used a short questionnaire that captured the main domains of patients' symptoms and experiences. (symptoms - cough, shortness of breath,                                                                                                                     | Online: Enrolled patients with an electronic health record portal account receive a questionnaire invitation where they evaluate symptoms, those not enrolled in the patient portal (or                                                             | They monitor and stratify responses to daily questionnaires, those with concerning symptoms are called. Calls used to evaluate symptoms, provide                                                                                                                                                | ED referrals (also anecdotal data about being provided education, comfort and getting 911 activation help). |

|          |     |                                                   |               |                                         |    |                                                                                           |                                                                                                                                                                                                                                                                                                                                                                                                                                                                                                       |                                                                                                                                                                                                                                                                                                                               |                                                                                                                                                                                                                                                                                                                                                                            |                                                                                                                                                                                                                                                 |                                                                           |
|----------|-----|---------------------------------------------------|---------------|-----------------------------------------|----|-------------------------------------------------------------------------------------------|-------------------------------------------------------------------------------------------------------------------------------------------------------------------------------------------------------------------------------------------------------------------------------------------------------------------------------------------------------------------------------------------------------------------------------------------------------------------------------------------------------|-------------------------------------------------------------------------------------------------------------------------------------------------------------------------------------------------------------------------------------------------------------------------------------------------------------------------------|----------------------------------------------------------------------------------------------------------------------------------------------------------------------------------------------------------------------------------------------------------------------------------------------------------------------------------------------------------------------------|-------------------------------------------------------------------------------------------------------------------------------------------------------------------------------------------------------------------------------------------------|---------------------------------------------------------------------------|
|          |     |                                                   |               |                                         |    | based on clinical criteria. Later began only including those with positive COVID-19 test. |                                                                                                                                                                                                                                                                                                                                                                                                                                                                                                       | sore throat, muscle aches, trouble sleeping, lack of energy, feeling ill, fever, diarrhoea, stomach pain), patients were also asked how many analgesic/antipyretic tablets they are taking, symptoms of others in the household, and for a measured temperature.<br><br><b>Data for monitoring:</b> symptoms and temperature. | who do not respond) are called.                                                                                                                                                                                                                                                                                                                                            | information and answer questions.                                                                                                                                                                                                               |                                                                           |
| Annis*** | USA | Evaluation/ Published article                     | Pre-admission | Remote patient monitoring, telehealth   | SC | Patients with confirmed or suspected COVID-19                                             | Patients that were enrolled were either screened for COVID-19 through virtual care platforms (phone, video, online) or at an ED or urgent care visit and referred. Providers were informed about the programme as a care option. Had a referral order within electronic health records to gather the patients' required information and they developed a batch process to automate enrolment. Then patients received an email with information on how to activate and begin the programme (optional). | <b>Data for risk assessment:</b> patient-reported data (clinical signs and symptoms, medical history and medications).<br><br><b>Data for monitoring:</b> Daily check in questions to monitor/assess symptoms, later updated to include question that assessed pulse oximetry data.                                           | Online: GetWell Loop - daily check in questions for patients to assess their symptoms, patients could also send comments and questions through scrolling newsfeed. Patients could also call the Mhealth triage line for alerts or comments outside 8am-5pm (before they expanded the workforce to include 24/7 virtual care so alerts could be responded to out of hours). | GetWell Loop - symptom monitoring questions were monitored - concerning answers routed to dashboard for action by member of first responder team. Physicians would also text or call patients if an alert or comment was concerning/complained. | Hospital admissions, ED visits. Patient satisfaction data also collected. |
| O'Keefe  | USA | Observational study (retrospective cohort study)/ | Pre-admission | Telemedicine visits, virtual outpatient | SC | Patients with positive COVID-19 PCR test                                                  | Patients with positive COVID-19 PCR test from screening clinics or ED were referred                                                                                                                                                                                                                                                                                                                                                                                                                   | <b>Data for risk assessment:</b> patient-reported data (clinical signs and                                                                                                                                                                                                                                                    | Patients received regular calls                                                                                                                                                                                                                                                                                                                                            | Telephone - patients received regular calls, different levels of                                                                                                                                                                                | Hospitalisation (metric: days to hospitalisation).                        |

|          |        |                                                                     |                                  |                                            |    |                                                                               |                                                                                                                                                                                                                                                                                                                                                                                                                                                                                                                                                                                            |                                                                                                                                                                                                                                                                                                                                                                                                                                                                                                                                                           |                                                                                                                              |                                                                                                                     |                                                                                                             |
|----------|--------|---------------------------------------------------------------------|----------------------------------|--------------------------------------------|----|-------------------------------------------------------------------------------|--------------------------------------------------------------------------------------------------------------------------------------------------------------------------------------------------------------------------------------------------------------------------------------------------------------------------------------------------------------------------------------------------------------------------------------------------------------------------------------------------------------------------------------------------------------------------------------------|-----------------------------------------------------------------------------------------------------------------------------------------------------------------------------------------------------------------------------------------------------------------------------------------------------------------------------------------------------------------------------------------------------------------------------------------------------------------------------------------------------------------------------------------------------------|------------------------------------------------------------------------------------------------------------------------------|---------------------------------------------------------------------------------------------------------------------|-------------------------------------------------------------------------------------------------------------|
|          |        | Preprint                                                            |                                  | management, telephone monitoring           |    |                                                                               | for enrolment in the Virtual Outpatient Management Clinic. For those enrolling in the virtual clinic, risk assessment data were obtained during a scheduled telemedicine appointment.                                                                                                                                                                                                                                                                                                                                                                                                      | symptoms, medical history and medications).<br><br><b>Data for monitoring:</b><br>Reported symptom data (including temperature).                                                                                                                                                                                                                                                                                                                                                                                                                          |                                                                                                                              | observation e.g. frequency of calls and duration, based on assigned risk tier.                                      |                                                                                                             |
| Ford*    | USA    | Description of the service/ Published article                       | Pre-admission and step-down ward | Telehealth remote patient monitoring       | SC | Patients with confirmed COVID-19                                              | Used dedicated registry of COVID-19 patients - populated using the positive diagnostic test as the trigger (as well as with all patients using virtual urgent care for COVID-19 suspicions). All testing submitted through the site was pulled into the registry for potential enrolment in home monitoring as were all positive tests regardless of entry point (drive up, virtual urgent care, ED, inpatient admission or pre-op testing). Nurses could enrol, triage and follow patients - nurses contacted patients who tested positive and offered opportunity to enrol in programme. | <b>Data for risk assessment:</b><br>patient-reported data (clinical signs and symptoms, medical history and medications)<br><br><b>Data for monitoring:</b><br>Patient reported outcomes (PRO) survey– derived from validated community acquired pneumonia patient questionnaire (five item survey queries changes in patient reported dyspnea), later extended to include pulse oximetry (for select groups inc post hospitalisation) and digital thermometers (app also extended capabilities with Bluetooth pulse oximeters and digital thermometers). | Online: Via patient portal (Epic MyChart electronic health record) or app- nurse managers could choose which to prescribe.   | Monitored responses to PRO through portal or app, nurses can reach out by phone if symptoms worsen.                 | Nurse to patient encounter, referral for physician review, physician call, referral to ED, hospitalisation. |
| Agarwal* | Canada | Observational study (retrospective cross-sectional study)/ Preprint | Pre-admission                    | Remote home monitoring model, virtual care | PC | Patients with COVID-19 (swab or presumed positive) felt to be high-risk based | Patient attended PC and was triaged to low, moderate or high risk using clinical judgement. Follow-up virtual visits were booked with the resident or RN every                                                                                                                                                                                                                                                                                                                                                                                                                             | <b>Data for risk assessment:</b><br>Demographics, comorbidities, COVID status, risk of transmission, symptoms, oximeter                                                                                                                                                                                                                                                                                                                                                                                                                                   | Paper-based: Telephone calls directed by medical team but patients also had access to a dedicated on-call service 24-hours a | Telephone or video visits, 7-days a week by an inter-professional, family medicine led team. Data entered into EPIC | ED attendance, admission, referral to social worker.                                                        |

|         |       |                                                                     |                             |                                          |    |                                                                                                                                                                                                                               |                                                                                                                                                                                                                                                                                                              |                                                                                                                                                                                                           |                                                                                                                                                                                                             |                                                                                                                                                                                                                                                                                                                                                     |                                                          |
|---------|-------|---------------------------------------------------------------------|-----------------------------|------------------------------------------|----|-------------------------------------------------------------------------------------------------------------------------------------------------------------------------------------------------------------------------------|--------------------------------------------------------------------------------------------------------------------------------------------------------------------------------------------------------------------------------------------------------------------------------------------------------------|-----------------------------------------------------------------------------------------------------------------------------------------------------------------------------------------------------------|-------------------------------------------------------------------------------------------------------------------------------------------------------------------------------------------------------------|-----------------------------------------------------------------------------------------------------------------------------------------------------------------------------------------------------------------------------------------------------------------------------------------------------------------------------------------------------|----------------------------------------------------------|
|         |       |                                                                     |                             |                                          |    | on age, comorbid illness and respiratory symptoms.                                                                                                                                                                            | 1-3 days based on risk. Program aimed to follow patients from time of referral up to 14 days from symptom onset.                                                                                                                                                                                             | readings, thermometer readings.<br><br><b>Data for monitoring:</b> symptoms, oximeter readings, thermometer readings.                                                                                     | day. Pulse oximeters and thermometers were couriered to patients.                                                                                                                                           | using a standardized electronic flowsheet. A dashboard cataloguing each patient in the program with their risk level for deterioration and active care issues was developed to facilitate daily team huddles.                                                                                                                                       |                                                          |
| Xu      | China | Observational study (retrospective cohort study)/ Published article | Pre-admission               | Telemedicine system                      | SC | Confirmed or suspected cases of COVID-19                                                                                                                                                                                      | Patient attended hospital and was assessed for telemedicine system. The patient was given access to an online telemedicine form and a link to the WeChat app to the patient's mobile phone or by email.                                                                                                      | <b>Data for risk assessment:</b> Demographics, clinical history, clinical manifestations, lab tests, CT images<br><br><b>Data for monitoring:</b> changes in symptoms (including temperature).            | The patient was required to update their conditions on a daily basis using the telemedicine form. The patient joined a WeChat group to receive information and could set-up a one-to-one chat with the MDT. | Communication through telemedicine form and WeChat group.                                                                                                                                                                                                                                                                                           | ED attendance, admission, mortality, need for ECMO.      |
| Medina* | USA   | Service description/ Published article                              | Pre-admission and step-down | Home monitoring, home-based intervention | SC | Confirmed COVID-19 and risk factors: risk factors include age older than 60 or younger than 3, active immunosuppression, active cancer, end-stage renal disease on dialysis, diabetes, hypertension, coronary artery disease, | Patients are enrolled into the home monitoring program after an ambulatory virtual assessment with a clinician, or after hospital discharge for COVID-19. Patients receive an initial phone call with instructions. Patients from the hospital are monitored for 7 days and ambulatory patients for 14 days. | <b>Data for risk assessment:</b> patient-reported data (clinical signs and symptoms, medical history and medications).<br><br><b>Data for monitoring:</b> Symptoms, pulse oximetry readings, temperature. | Online: Patient records information on the MyCare Companion app.                                                                                                                                            | Daily monitoring of patients consists of telephonic outreach from a registered nurse or allied health professional and a self-monitoring app (MyCare Companion) that allows for patient-entered data. A pool of nurses and clinicians monitor the EMR registry and flag symptoms that are worsening. After a nursing assessment, a patient may then | Time to escalation, ED attendance, admission, mortality. |

|           |                 |                                              |               |                                                |    |                                                                                                     |                                                                                                                                                                         |                                                                                                                                                                          |                                                                                                                                                                 |                                                                                                                                                                                                          |                                                                                                                              |
|-----------|-----------------|----------------------------------------------|---------------|------------------------------------------------|----|-----------------------------------------------------------------------------------------------------|-------------------------------------------------------------------------------------------------------------------------------------------------------------------------|--------------------------------------------------------------------------------------------------------------------------------------------------------------------------|-----------------------------------------------------------------------------------------------------------------------------------------------------------------|----------------------------------------------------------------------------------------------------------------------------------------------------------------------------------------------------------|------------------------------------------------------------------------------------------------------------------------------|
|           |                 |                                              |               |                                                |    | heart failure with reduced ejection fraction, chronic lung disease, HIV/AIDS, and organ transplant. |                                                                                                                                                                         |                                                                                                                                                                          |                                                                                                                                                                 | be escalated for additional care (virtual call or referral to ED).                                                                                                                                       |                                                                                                                              |
| Lam**     | Canada          | Feasibility study/<br>Published article      | Pre-admission | Virtual care program                           | SC | Adult patients who tested positive for COVID-19.                                                    | Infection Prevention and Control receives positive test result. Patient contacted via phone to onboard. Follow-up was discontinued after signs of clinical improvement. | <b>Data for risk assessment:</b><br>Clinical and travel history, symptoms, exposure.<br><b>Data for monitoring:</b><br>changes in symptoms (including temperature).      | Online and paper-based: Patients record data on the Ontario Telemedicine Network virtual care platform, but if they refuse, these data were collected by phone. | Stable patients contacted a minimum of once a week, patients who were deemed to require more frequent follow-up were contacted up to twice a day by telephone. Escalation arranged by the service to ED. | Time from swab collection to first assessment, duration of virtual care, ED attendance, admission, ICU admission, mortality. |
| Grutters* | The Netherlands | Description of service/<br>Published article | Step-down     | Home telemonitoring, remote patient monitoring | SC | Hospitalised patients considered appropriate for discharge with remote monitoring.                  | When patient's clinical condition in hospital improved, they were approached for the home monitoring service.                                                           | <b>Data for risk assessment:</b><br>Clinical and travel history, symptoms, exposure<br><b>Data for monitoring:</b><br>Symptoms, pulse oximeter and temperature readings. | Online: Patient recorded data on an app on a daily basis. Patients were able to post comments on the app.                                                       | Data from the app displayed on a real-time basis on a dashboard. Staff also made calls to help with oxygen therapy queries and for follow-ups.                                                           | ICU admission, LoS, reassessment at hospital, readmission, mortality, patient experience, costs.                             |
| Shah*     | USA             | Observational study (prospective study)/     | Pre-admission | Home pulse oximetry monitoring                 | SC | Confirmed or suspected COVID-19 presenting in ED.                                                   | Patient discharged from ED with confirmed or suspected COVID-19 and were given a                                                                                        | <b>Data for risk assessment:</b><br>Demographics, medical history, lab tests                                                                                             | Paper-based: Patients recorded measurements and communicated these                                                                                              | Patients were called once a day.                                                                                                                                                                         | Admission, resting pulse oximeter readings, LoS, ICU admission, time to drop, development of acute respiratory distress      |



|            |         |                                                          |                             |                                    |    |                                                  |                                                                                                                                                                                      |                                                                                                                                                  |                                                                                                                                                                                                                  |                                                                                                                                                                                                                                         |                                                                                                                           |
|------------|---------|----------------------------------------------------------|-----------------------------|------------------------------------|----|--------------------------------------------------|--------------------------------------------------------------------------------------------------------------------------------------------------------------------------------------|--------------------------------------------------------------------------------------------------------------------------------------------------|------------------------------------------------------------------------------------------------------------------------------------------------------------------------------------------------------------------|-----------------------------------------------------------------------------------------------------------------------------------------------------------------------------------------------------------------------------------------|---------------------------------------------------------------------------------------------------------------------------|
|            |         | Published article                                        |                             |                                    |    |                                                  | pulse oximeter. Patients were followed-up for 7 days.                                                                                                                                | <b>Data for monitoring:</b><br>Symptoms, pulse oximeter and temperature readings.                                                                | to staff once a day during a phone call.                                                                                                                                                                         |                                                                                                                                                                                                                                         | syndrome, septic shock, mortality.                                                                                        |
| Morgan**   | USA     | Description of the service/<br>Published article         | Pre-admission and step-down | Remote monitoring patients         | SC | Confirmed or suspected cases.                    | Patient could be added to the service after testing positive, during an ED visit, a call or telehealth visit with any clinician, or following discharge from an inpatient admission. | <b>Data for risk-assessment:</b><br>symptoms<br><br><b>Data for monitoring:</b><br>symptoms                                                      | SMS based: patient received twice-daily message and could reply to messages sent by the clinical team.                                                                                                           | Patients were monitored by a nurse as information submitted by patients triggered EHR inbox message.                                                                                                                                    | ED attendance, admission, length of stay, escalation.                                                                     |
| O'Carroll* | Ireland | Description of the service/<br>Published article         | Step-down                   | Remote monitoring                  | SC | Confirmed patients deemed suitable for discharge | Patients who could be discharged from hospital as they did not require supplemental oxygen.                                                                                          | <b>Data for monitoring:</b><br>symptoms, oxygen saturations (pulse oximetry).                                                                    | Pulse oximeters were connected to an app. The app sent a prompt to patients to record oxygen saturations 4 times a day.                                                                                          | The app triggered an alert and the medical team contacted the patient and gave instructions on next steps.                                                                                                                              | Readmissions, length of stay, ICU admission                                                                               |
| Bell       | UK      | Description of service/<br>Published article             | Pre-admission               | Remote monitoring, rapid follow-up | SC | Confirmed or suspected cases.                    | Patient discharged from ED and given a pulse oximeter based on pre-established criteria (CPR >50; RR>20; O2 saturation 94 or 95%; exercise desaturation >2%).                        | <b>Data for risk assessment:</b> not specified<br><br><b>Data for monitoring:</b><br>symptoms, oxygen saturations (pulse oximetry, demographics, | Telephone assessment made 36 hours post ED visit in the first instance and an electronic proforma was used to document the assessments. The frequency of follow-up depended on the level of risk of the patient. | Signs of deterioration identified by the clinical team during calls or initiated by 'patient-activated' calls could prompt the need for face to face review. Patients with symptoms post 28 days were referred to a respiratory clinic. | Reattendance (planned and unplanned), admission, referral to respiratory clinic, referral to other secondary care clinic. |
| Gaeta      | USA     | Description of service/<br>Published conference abstract | Pre-admission               | Remote monitoring, rapid follow-up | SC | Confirmed or suspected cases.                    | Patient discharged from ED and given a pulse oximeter or PO + oxygen concentrators based on pre-established criteria (RR<22; O2 saturation 90% or above).                            | <b>Data for risk assessment:</b> oxygen saturations and RR.<br><br><b>Data for monitoring:</b><br>symptoms, O2 saturations, HR, RR.              | Daily telehealth consultations for seven days. Observations recorded on patient charts.                                                                                                                          | Not specified                                                                                                                                                                                                                           | Reattendance, disease course, hospital LoS, ICU requirements, respiratory support, mortality and loss to follow-up.       |

|         |             |                                                  |                             |                                  |    |                                                                                          |                                                                                                                                                                                                                                         |                                                                                                                |                                                                                                                                                     |                                                                                                                                                                                                                   |                                                            |
|---------|-------------|--------------------------------------------------|-----------------------------|----------------------------------|----|------------------------------------------------------------------------------------------|-----------------------------------------------------------------------------------------------------------------------------------------------------------------------------------------------------------------------------------------|----------------------------------------------------------------------------------------------------------------|-----------------------------------------------------------------------------------------------------------------------------------------------------|-------------------------------------------------------------------------------------------------------------------------------------------------------------------------------------------------------------------|------------------------------------------------------------|
| Gordon  | USA         | Description of service/<br>Published article     | Step-down                   | Remote patient monitoring        | SC | Confirmed or suspected cases.                                                            | Patient referred to the service at the time of discharge. The service was for adult patients who did not have comorbid highly symptomatic non-COVID-19 conditions or cognitive barriers to use the devices.                             | <b>Data for risk assessment:</b> not specified.<br><b>Data for monitoring:</b> symptoms, O2 sats, temperature. | Patients used an app (MyChart Care Companion) to record observations and abnormal symptoms were flagged and assessed by nurses leading the service. | Symptoms that worsen or no response from patient triggered a message to the the nursing team who would then call the patient. Patient could be referred to doctor to determine if a visit to the ED was required. | Length of stay, readmission, ED attendance.                |
| Kodama  | USA         | Description of service/<br>Published article     | Step-down                   | Remote patient monitoring        | SC | Confirmed or suspected cases, older than 18 years, O2 sats < 92%, confidence using a PO. | Patient was identified at the point of discharge based on pre-established criteria.                                                                                                                                                     | <b>Data for risk assessment:</b> age, O2 sats.<br><b>Data for monitoring:</b> O2 sats, HR, RR,                 | Patients used an app to input observations and signs were monitored twice a day.                                                                    | Triggers for escalation appeared on a dashboard monitored by a nurse. The nurse also called patients twice a day.                                                                                                 | ED attendance, admission.                                  |
| Nunan   | UK          | Evaluation/<br>Published article                 | Pre-admission and step-down | Virtual monitoring, virtual ward | SC | Confirmed or suspected cases.                                                            | Patient was triaged into one of three groups based on O2 sats. Those with O2 sat > 94% could be referred to virtual ward. Some patients referred after discharge and others prior to admission. Patient was given a PO and information. | <b>Data for risk assessment:</b> O2 sats, symptoms, imaging<br><b>Data for monitoring:</b>                     | PA called patients on a daily basis going through a script of questions about their symptoms.                                                       | When the clinical team identified a case of deterioration the patient could be asked to call emergency services or attend ED.                                                                                     | ED attendance, admission, ICU admission, mortality, costs. |
| Pereira | Brazil      | Evaluation/<br>Preprint                          | Pre-admission               | Remote monitoring                | SC | Confirmed or suspected cases + non-COVID-19 control group                                | Not specified                                                                                                                                                                                                                           | <b>Data for risk assessment:</b> not specified<br><b>Data for monitoring:</b> O2 sats, BPM, temperature, PEF.  | Patient asked to input observations into an app as well as keep a paper diary. Measurements are taken twice daily.                                  | The clinical team can monitor patient observations on a dashboard                                                                                                                                                 | Indicators of deterioration.                               |
| Silven  | Netherlands | Description of the service/<br>Published article | Pre-admission and step-down | Telemonitoring                   | SC | Confirmed or suspected cases presenting in the ED or after discharge.                    | Patients with mild or moderate symptoms were identified in the ED and onboarded to the service. Patients admitted to COVID-19 ward who were                                                                                             | <b>Data for monitoring:</b> O2 sats, BP, temperature, HR, RR                                                   | In the initial stages of implementation patients kept a record of their observations and these were added manually by th clinical team to their     | A physician of PA carried out daily video consultations to monitor progress.                                                                                                                                      | Admission, mortality                                       |

|                 |    |                                  |                             |                                    |           |                                                                                           |                                                                                                                                       |                                                                                                                                                               |                                                                                                                                                                                            |                                                                                                                                                                                                                                                                                                 |
|-----------------|----|----------------------------------|-----------------------------|------------------------------------|-----------|-------------------------------------------------------------------------------------------|---------------------------------------------------------------------------------------------------------------------------------------|---------------------------------------------------------------------------------------------------------------------------------------------------------------|--------------------------------------------------------------------------------------------------------------------------------------------------------------------------------------------|-------------------------------------------------------------------------------------------------------------------------------------------------------------------------------------------------------------------------------------------------------------------------------------------------|
|                 |    |                                  |                             |                                    |           | Over 18 years, in possession of smartphone + internet, able to communicate through phone. | eligible for discharge could also be onboarded. Patients were given a COVID Box containing: PO, BP monitor, thermometer, information. |                                                                                                                                                               | patient chart. In a later stage, patients used an app to record their observations and these were transmitted automatically to the patient's electronic chart.                             |                                                                                                                                                                                                                                                                                                 |
| Francis         | UK | Cohort study/<br>Preprint        | Pre-admission and step-down | Virtual hospital remote assessment | SC        | Confirmed or suspected cases presenting in the ED or after discharge.                     | Patients in the ED or at the point of discharge were assessed for suitability for the service. Patients were triaged based on risk.   | <b>Data for risk assessment:</b> not included in preprint.<br><b>Data for monitoring:</b> O2 sats, BP, temperature                                            | Patients were asked to record their symptoms and observations on paper.                                                                                                                    | A member of the clinical team called patients regularly to monitor their symptoms and identify any signs of deterioration.<br><br>Admission, mortality, predictors of adverse outcomes.                                                                                                         |
| Vindrola-Padros | UK | Service evaluation/<br>Preprint  | Pre-admission and step-down | Virtual ward                       | SC and PC | Confirmed or suspected cases presenting in the ED or after discharge.                     | The patient was triaged through emergency telephone numbers, GP practice, or ED. Some were also triaged at the point of discharge.    | <b>Data for risk assessment:</b> not included in preprint.<br><b>Data for monitoring:</b> symptoms, O2 sats, heart rate, temperature and blood oxygen levels. | The patient was given a pulse oximeter, patient information (including escalation warning signs and what to do) and a mechanism for recording observations regularly (app or paper diary). | The patient received regular monitoring calls from staff capturing changes in symptoms. The sites using apps for patient monitoring triggered alerts if symptoms pointed to deterioration.<br><br>Ventilation, mortality, reattendance to ED, admission, ICU admission, call emergency services |
| Wilcock         | UK | Prospective study/<br>Preprint   | Pre-admission               | Community oximetry monitoring      | PC        | Confirmed case and not living in a care facility.                                         | After a positive test result, the patient was invited to the service and sent a PO, instructions and diary.                           | <b>Data for risk assessment:</b> not included in preprint.<br><b>Data for monitoring:</b> symptoms, O2 sats, degree of breathlessness, Roth score.            | Patients recorded their symptoms and O2 sats twice a day on paper.                                                                                                                         | The patient received regular monitoring calls from staff capturing changes in symptoms.<br><br>Deterioration, admission.                                                                                                                                                                        |
| Clarke          | UK | Evaluation/<br>published article | Pre-admission and step-down | Home oximetry                      | SC and PC | Confirmed or suspected cases presenting in the ED, primary care                           | Not specified                                                                                                                         | Not specified                                                                                                                                                 | Not specified                                                                                                                                                                              | Not specified<br><br>ED attendance, admission, mortality                                                                                                                                                                                                                                        |

|  |  |  |  |  |  |                     |  |  |  |  |  |
|--|--|--|--|--|--|---------------------|--|--|--|--|--|
|  |  |  |  |  |  | or after discharge. |  |  |  |  |  |
|--|--|--|--|--|--|---------------------|--|--|--|--|--|

\*Used a pulse oximeter

\*\*Did not use pulse oximetry in the main model described in the article but flagged the launching of a companion programme or incorporating pulse oximetry and escalation based on oxygen saturation at a later date.

\*\*\*Pulse oximetry added three weeks after implementation

SC=secondary care

PC=primary care

HR= heart rate

RR= respiration rate

PO= pulse oximetry
